# Supplementary material
Source: PubMed Central journal article supplement (PMC5518981)
Supplement: cr201732x1.pdf [file cr201732x1.pdf]

**Supplementary Information for:**

**The Genetics of Tiger Pelage Color Variations**

**Xiao Xu *et al.***

**Contents**

Supplementary Discussion

Materials and Methods

Supplementary References 1-25

Tables S1-S4

Figures S1

## **Supplementary Discussion**

### **Melanin content in tiger hairs**

The melanin content in the zigzag hairs from the background non-striped region of a golden tiger was compared to that of a wild-type orange tiger via spectrophotometric measurement. A significant decrease in eumelanin in the golden tiger's hairs (Figure S1B) was consistent with its observed reduced degree of black pigmentation (Figure 1B). Intriguingly, pheomelanin in the golden tiger's hairs also showed a slight reduction (Figure S1B) despite its prolonged central agouti band, suggesting a likely lower density of pheomelanosomes in the golden tiger's fur, as evident in the overall lighter color of its agouti band (Figures 1A, S1A). It seems surprising yet reasonable that golden tigers with a prolonged pheomelanin band exhibit an overall decrease in pheomelanin content. *ASIP* expression switches pigment synthesis from eumelanin to pheomelanin by inhibiting MC1R signaling [1, 2]. However, with an increased level of *ASIP* expression or the extended presence of *ASIP*, MC1R signaling would be further decreased [2], leading to a reduction in MC1R-associated TYR activity and hence a lower level of pheomelanogenesis. Therefore, the golden tiger blonde color was most likely caused by a lower density of pheomelanosomes as well as a prolonged agouti band in hairs.

### **Implications for tiger genomic diversity and conservation**

In humans, *CORIN* is primarily expressed in cardiac myocytes and regulates blood pressure by converting atrial natriuretic peptide precursor (pro-ANP) into its

mature form (ANP) [3, 4]. Mutations in *CORIN* have been associated with human hypertension and heart failure [5-7], symptoms that have not historically been recorded in golden and snow white tigers, although this could simply be due to a lack of studies. Alternatively, the p.H587Y mutation might not affect the efficiency of *CORIN* in activating natriuretic peptide in tigers, but further studies are needed in this regard. It is also noteworthy that golden and snow white tigers tend to grow larger than their wild-type counterparts in the same captive environment (Dong GX, personal communications). Intriguingly, *CORIN* has been proposed to regulate body weight by degrading agouti-related protein (AGRP) [8]. AGRP is expressed in the hypothalamus and antagonizes melanocortin receptor 4 (MC4R), which regulates feeding and metabolism [9, 10]. Although *CORIN* is not expressed in the brain [3], it may be able to reach the hypothalamus through blood circulation [11]. The potential association between *CORIN* and body mass increases in animals merits further examination.

The *SLC45A2*-associated white tiger morph is a viable, naturally occurring genetic polymorphism that has persisted for centuries in Bengal tigers [12]. Throughout history, white tigers were sighted sporadically across the Indian subcontinent, many of which were captured or shot as mature adults, which provides evidence that they are 'normal' and able to survive and reproduce [13]. The reasons for the extinction of wild white tigers are undoubtedly the same as those that drove the widespread decline of wild tigers in general, rather than the genetic abnormalities. Indeed, although some mutations in *SLC45A2* have been linked to a class of human

oculocutaneous albinism, various natural polymorphisms in *SLC45A2* occur in people, horses, quail and chickens without causing physiological defects other than hypopigmentation [14, 15]. The physiological effects of the *CORIN* variant on golden and snow white tigers remain unclear, considering the protein's critical involvement in multiple cellular and developmental pathways and the fact that confirmed records in the wild are much less common than in the white tiger.

Well-managed captive populations of wild animals can assist in education, research and fundraising, and have been justified as a genetic reservoir for wild animals and insurance against extinction [16]. However, deliberate inbreeding to maintain recessive traits in captivity have led to many undesirable traits associated with captive white, golden and snow white tigers. Most are probably due to improper husbandry, inbreeding depression and general maladies experienced by captive animals [17].

## **Materials and Methods**

### ***Ethical Statement***

Biological samples used in the study were recruited in full compliance with the Convention on International Trade in Endangered Species (CITES) and other relevant permissions issued to S. J. Luo at the School of Life Sciences, Peking University, by the State Forestry Administration of China. All biological samples were collected during veterinary examinations for health and physical conditions, and animals were handled following the general animal welfare code of practice.

### ***Biological samples***

Fifty-one blood samples from 11 wild-type orange, 9 golden, 18 white and 13 snow white tigers were collected from Chimelong Safari Park, Guangzhou, China. Six blood samples from two white and four orange tigers were collected from Shanghai Zoo, Shanghai, China. Forty-three hair samples from 17 orange, 7 golden, 10 white and 9 snow white tigers were collected during grooming from Tiger Preserve, Myrtle Beach, USA. In addition, 96 DNA samples from unrelated animals, including 90 orange and 6 white tigers, were obtained from the DNA collection of the Laboratory of Genomics Diversity, NCI-Frederick, MD. Information regarding all samples is detailed in Table S1.

To obtain cDNA of the identified gene, one skin biopsy sample from a stillborn kitten was collected from Yongkang Veterinary Clinic, Beijing, and stored at -80°C.

Genomic DNA was extracted from blood or hair samples using the DNeasy Blood and Tissue Kit (QIAGEN) and following the manufacturer's instructions. Total RNA was extracted from the cat skin sample with TRIzol (Invitrogen), and cDNAs were subsequently obtained through RT-PCR with the Superscript® III First-Strand Synthesis System (Invitrogen).

### ***Visual examination of tiger hair morphology***

To examine the morphology of the tiger hairs, clusters of full-length hairs were hand plucked from individuals representing all four tiger color morphs at Chimelong

Safari Park, Guangzhou, China. At least four clusters of hairs from the torso flank were taken from the anesthetized animal. Except for the stripeless snow tiger, hairs from both stripes and outside the stripes (background fur) were collected. Individual hairs were isolated from each hair cluster and were observed and photographed using a Leica M125 microscope system with 8x zoom lens under the incident light conditions. The length of each hair section (black tip, sub-apical yellow band and black base) was manually measured on the 8x zoomed screen. In total, 89 and 87 zigzag hairs from the background fur of one orange tiger and one golden tiger, respectively, were measured.

#### ***Spectrophotometric determination of eumelanin and pheomelanin***

Spectrophotometric assays were conducted to quantitatively measure eumelanin [18] and pheomelanin [19] in different color morphs of tigers. Four specimens of plucked hairs, from stripes and background of a golden tiger and an orange tiger, respectively, were prepared and measured. In addition, plucked hairs from the background fur of a white tiger were used as blank control in both eumelanin and pheomelanin assays. The five hair samples each weighed 7 mg and were homogenized with a glass homogenizer in ddH<sub>2</sub>O to a final concentration of 20 mg/mL at 350  $\mu$  L and then aliquoted for subsequent assays of eumelanin (absorbance at 350 nm,  $A_{350}$ ) and pheomelanin (absorbance at 400 nm,  $A_{400}$ ) with a BioTek Eon spectrophotometer as described previously. The final result of eumelanin or pheomelanin was normalized to the initial hair quantity, subtracted from the white

tiger hair's reading of eumelanin or pheomelanin, and averaged across three replications.

### ***Candidate gene sequencing***

Four pigmentation genes (*MC1R*, *ASIP*, *TYR* and *TYRP1*) known to be involved in the coat color genetics of domestic cats were selected as candidate genes for the tiger *WB* locus [20, 21]. Coding regions of the four genes were amplified and sequenced (Table S2) in unrelated individuals, including golden (n=1), snow white (n=1) and orange (n=6) tigers, following PCR and Sanger sequencing procedures as previously described [15]. No variation associated with *WB* was identified.

### ***Gene mapping via genome-wide association study (GWAS)***

Nineteen individuals, including golden (n=1), snow white (n=8) and white (n=10) tigers, were assembled for mapping the *wideband* (*WB* locus) gene. Golden and snow white tigers homozygous at the *WB* locus (*wb/wb*, n=9) were carefully selected from Chimelong Safari Park to represent the GWAS case group. The control group was represented by white tigers that were heterozygous at the *WB* locus (*WB/wb*, n=10). These individuals were selected from the same extended family with the *wb/wb* tigers according to zoo breeding records to ensure a similar genetic background with the case group.

Whole-genome sequencing (WGS) was completed in three *wb/wb* tigers (one golden and two snow white) in our previous study [15]. Restriction-site-associated

DNA (RAD) sequencing was applied to the other 16 individuals. Restriction site *Pst*I was selected for RAD sequencing to ensure a 1/20 kb genome-wide SNP density. A genomic paired-end library for RAD-seq was constructed following protocols described previously [15] and sequenced on an Illumina HiSeq 2000 sequencer. Each RAD library was sequenced to an approximate 11-fold depth with an average of 4.39 Gb of data (Table S3). The RAD-seq and WGS were performed at the Biodynamic Optical Imaging Center (BIOPIC) at Peking University.

Procedures for genome sequencing data processing, including adapter trimming, read alignment and SNPs calling, were performed following the workflow described previously [15]. SNPs with data from at least 17 of the 19 individuals were selected for GWAS analysis. The eight snow white tiger and one golden tiger were set as the case group, and the 10 white tigers were set as the control group. GWAS analysis was performed in PLINK 1.07 [22], and the significance of the genotype-phenotype association was calculated by Fisher's exact test under the recessive model. SNPs with a strong association ( $p < 0.0001$ ) were further examined for the genotypes of the 19 tigers. SNPs with a genotype that failed to match the recessive inheritance pattern of the golden trait were considered as false positive signals and discarded. Scaffolds with positive association signals were classified as candidate scaffolds.

Candidate scaffolds were mapped to the cat genome (*Felis\_catus* 6.2) [23] to determine conserved syntenies. Haplotypes of the 19 individuals across the candidate scaffolds were inferred using PHASE 2.1 [24] and combined based on the scaffold syntenies. The haplotype block shared by the nine individuals from the case group was



designated as the putative region for the *WB* locus.

### **Identification of the feline *wideband* gene**

Tiger coding exons within the candidate region were obtained from the tiger reference genome annotation and subsequently refined by aligning with the available human, mouse and dog CDS. In addition to the genome data of the three *wb/wb* tigers, the WGS data of 30 orange tigers (unrelated to any golden tiger lineages) from another independent study were also analyzed together. SNPs/indels from non-coding regions were first excluded, and those not fixed in the three *wb/wb* tigers were also excluded. To eliminate common variations within tiger populations, SNPs/indels presented in any of the 31 orange tigers were further excluded. SNPs/indels causing amino acid changes from the remaining SNPs/indels within the candidate region were selected and considered the putative mutation(s).

The potential impact of non-synonymous substitutions in coding regions was evaluated by multivariate analysis of protein polymorphism (MAPP) [25], which considers both evolutionary constraints and the physicochemical properties of amino acid residues; a MAPP score greater than 10 suggests a likely impact of such changes on protein function.

The putative mutation was then validated in an extended sample set of 197 unrelated tigers, including 123 orange, 16 golden, 36 white and 22 snow white tigers. Primers (Table S2) to amplify the candidate *golden* gene were designed based on the tiger reference genome with Primer3 (<http://bioinfo.ut.ee/primer3-0.4.0/primer3/>).

PCR and sequencing procedures followed protocols previously described. In addition, the *SLC45A2* p.A477V variant was also examined in the same set of tiger samples.

### **Functional validation of the *CORIN* p.H587Y mutation**

Because sequences of *CORIN* from either cat or tiger were unavailable, we obtained the full cDNA of cat *CORIN* by RT-PCR with a cat skin sample. Sequences of tiger *CORIN* and *ASIP* cDNA were then assembled by aligning cat *CORIN* and cat *ASIP* (NM\_001009190) to the tiger reference genome [7]. The cDNAs of tiger *CORIN* and tiger *ASIP* were synthesized accordingly and ligated to the expression vector p3XFLAG-CMV-14, with three tandem FLAG epitopes fused to the C-terminal end. The tiger *CORIN* p.H587Y mutant was obtained by site-directed mutagenesis.

Plasmids containing *CORIN*, the *CORIN* p.H587Y mutation and *ASIP* were transfected into human HEK 293 cells, and *CORIN* and the *CORIN* p.H587Y mutation were co-transfected with *ASIP*. The culture medium was replaced after 18 hours with fresh medium, and the culture supernatants were harvested after another 12 hours. To detect *CORIN*'s effect on the secreted *ASIP*, the medium of *ASIP*-expressing cells was mixed with *CORIN*-variant-expressing cells and cultured for another 3 and 6 hours. HEK 293 cells were lysed in a buffer containing 50 mM Tris-HCl (pH 8.0), 150 mM NaCl, 1% Triton X-100. The expression of tiger *CORIN*, *CORIN* p.H587Y, and *ASIP* from the cell lysates and medium were detected by Western blotting using anti-FLAG antibody.

## Supplementary References

- 1 Barsh GS. The genetics of pigmentation: from fancy genes to complex traits. *Trends Genet* 1996; **12**:299-305.
- 2 Barsh GS. Regulation of pigment type switching by agouti, melanocortin signaling, attractin, and mahoganoid. In: Nordlund JJ, Boissy RE, Hearing VJ *et al.* eds. *The Pigmentary System: Physiology and Pathophysiology*. Oxford: Blackwell Publishing Ltd 2006:395-410.
- 3 Yan W, Sheng N, Seto M, Morser J, Wu Q. Corin, a mosaic transmembrane serine protease encoded by a novel cDNA from human heart. *J Biol Chem* 1999; **274**:14926-14935.
- 4 Yan W, Wu F, Morser J, Wu Q. Corin, a transmembrane cardiac serine protease, acts as a pro-atrial natriuretic peptide-converting enzyme. *Proc Natl Acad Sci USA* 2000; **97**:8525-8529.
- 5 Dong N, Fang C, Jiang Y *et al.* Corin mutation R539C from hypertensive patients impairs zymogen activation and generates an inactive alternative ectodomain fragment. *J Biol Chem* 2013; **288**:7867-7874.
- 6 Dries DL, Victor RG, Rame JE *et al.* Corin gene minor allele defined by 2 missense mutations is common in blacks and associated with high blood pressure and hypertension. *Circulation* 2005; **112**:2403-2410.
- 7 Rame JE, Drazner MH, Post W *et al.* Corin I555 (P568) allele is associated with enhanced cardiac hypertrophic response to increased systemic afterload. *Hypertension* 2007; **49**:857-864.

- 8 Wu Q, Jiang J, Wang W. Corin for Treating Obesity and Diabetes. United States Patent Application Publication 2009.
- 9 Huszar D, Lynch CA, Fairchild-Huntress V *et al.* Targeted disruption of the melanocortin-4 receptor results in obesity in mice. *Cell* 1997; **88**:131-141.
- 10 Ollmann MM, Wilson BD, Yang Y-K *et al.* Antagonism of central melanocortin receptors in vitro and in vivo by agouti-related protein. *Science* 1997; **278**:135-138.
- 11 Ichiki T, Huntley BK, Heublein DM *et al.* Corin Is Present in the Normal Human Heart, Kidney, and Blood, with Pro-B-Type Natriuretic Peptide Processing in the Circulation. *Clin Chem* 2011; **57**:40-47.
- 12 Sankhala K. Tiger! The Story of the Indian Tiger: Simon and Schuster 1997.
- 13 Desai JH. The White tiger. New Delhi: Publications Division, Ministry of Information and Broadcasting, Govt. of India 1999.
- 14 Mongera A, Dooley CM. Of white tigers and solute carriers. *Pigment Cell Melanoma Res* 2013; **26**:787-789.
- 15 Xu X, Dong G-X, Hu X-S *et al.* The genetic basis of white tigers. *Curr Biol* 2013; **23**:1031-1035.
- 16 Christie S. Why keep tigers in zoos? In: Tilson R, Nyhus P. eds. Tigers of the World: the Science, Politics, and Conservation of Panthera tigris, 2nd edition: Academy Press 2010:205-214.
- 17 Maruska EJ. White tiger: phantom or freak? In: Tilson R, Seal US. eds. Tigers of the World: The Biology, Biopolitics, Management, and Conservation of an Endangered Species. Park Ridge, New York: Noyes Publications 1987:372-379.

- 18 Ito S, Wakamatsu K, Ozeki H. Spectrophotometric assay of eumelanin in tissue samples. *Anal Biochem* 1993; **215**:273-277.
- 19 Ozeki H, Ito S, Wakamatsu K, Hirobe T. Chemical Characterization of Hair Melanins in Various Coat-Color Mutants of Mice. *J Invest Dermatol* 1995; **105**:361-366.
- 20 Peterschmitt M, Grain F, Arnaud B, Deleage G, Lambert V. Mutation in the melanocortin 1 receptor is associated with amber colour in the Norwegian Forest Cat. *Anim Genet* 2009; **40**:547-552.
- 21 Schmidt-Kuntzel A, Eizirik E, O'Brien SJ, Menotti-Raymond M. Tyrosinase and tyrosinase related protein 1 alleles specify domestic cat coat color phenotypes of the albino and brown loci. *J Hered* 2005; **96**:289-301.
- 22 Purcell S, Neale B, Todd-Brown K *et al.* PLINK: a tool set for whole-genome association and population-based linkage analyses. *Am J Hum Genet* 2007; **81**:559-575.
- 23 Montague MJ, Li G, Gandolfi B *et al.* Comparative analysis of the domestic cat genome reveals genetic signatures underlying feline biology and domestication. *Proc Natl Acad Sci U S A* 2014; **111**:17230-17235.
- 24 Stephens M, Smith NJ, Donnelly P. A new statistical method for haplotype reconstruction from population data. *Am J Hum Genet* 2001; **68**:978-989.
- 25 Stone EA, Sidow A. Physicochemical constraint violation by missense substitutions mediates impairment of protein function and disease severity. *Genome Res* 2005; **15**:978-986.

## Supplementary Tables and Figures

Table S1. Tiger samples used in the study.

Table S2. Primers for PCR amplification and Sanger sequencing.

Table S3. Summary of RAD-seq and WGS in 19 tigers for GWAS.

Table S4. Genes located within the 9.2 Mb region associated with the WB locus.

Figure S1. **(A)** Photographic and schematic illustration of tiger zigzag hairs. **(B)**

Spectrophotometric measurement of eumelanin and pheomelanin in agouti zigzag hairs from orange and golden tigers. The value was calculated from three replicates using non-pigmented hairs from a white tiger's background fur as the baseline blank.

**(C)** Association of the "wideband" trait on tiger genome scaffolds 1457 and 97. The scaffold orientation is indicated by arrows, and the *wideband*-linked genomic region is specified.

**Table S1. Tiger samples used in the study.**

| Animal    | Color  | CORIN SLC45A2 |       | Owner & Contact                           | Birth Status | Sex | Note                                |
|-----------|--------|---------------|-------|-------------------------------------------|--------------|-----|-------------------------------------|
|           |        | (C>T)         | (C>T) |                                           |              |     |                                     |
| GZXJ003   | Golden | TT            | CT    | Chimelong Safari Park, China, Dong GX     | captive      | F   | RAD-seq for <i>white</i>            |
| GZXJ005   | Golden | TT            | CT    | Chimelong Safari Park, China, Dong GX     | captive      | M   | RAD-seq for <i>white</i>            |
| GZXJ026   | Golden | TT            | CT    | Chimelong Safari Park, China, Dong GX     | captive      | F   | RAD-seq for <i>white</i>            |
| GZXJ027   | Golden | TT            | CT    | Chimelong Safari Park, China, Dong GX     | captive      | F   | RAD-seq for <i>white</i>            |
| GZXJ028   | Golden | TT            | CT    | Chimelong Safari Park, China, Dong GX     | captive      | F   | RAD-seq for <i>white</i>            |
| GZXJ029   | Golden | TT            | CT    | Chimelong Safari Park, China, Dong GX     | captive      | F   | RAD-seq for <i>white</i>            |
| GZXJ030   | Golden | TT            | CT    | Chimelong Safari Park, China, Dong GX     | captive      | M   | RAD-seq for <i>white</i>            |
| GZXJ033   | Golden | TT            | CT    | Chimelong Safari Park, China, Dong GX     | captive      | F   | RAD-seq for <i>white</i>            |
| GZXJ039   | Golden | TT            | CT    | Chimelong Safari Park, China, Dong GX     | captive      | F   | WGS for <i>wideband &amp; white</i> |
| Brahman   | Golden | TT            | CC    | Tiger Preserve Myrtle Beach, USA, Antle B | captive      | M   | individual for validation           |
| Krupa     | Golden | TT            | CT    | Tiger Preserve Myrtle Beach, USA, Antle B | captive      | F   | individual for validation           |
| Mata      | Golden | TT            | CT    | Tiger Preserve Myrtle Beach, USA, Antle B | captive      | F   | individual for validation           |
| Muktari   | Golden | TT            | CT    | Tiger Preserve Myrtle Beach, USA, Antle B | captive      | M   | individual for validation           |
| Padha     | Golden | TT            | CT    | Tiger Preserve Myrtle Beach, USA, Antle B | captive      | F   | individual for validation           |
| Raga      | Golden | TT            | CC    | Tiger Preserve Myrtle Beach, USA, Antle B | captive      | M   | individual for validation           |
| Rama      | Golden | TT            | CC    | Tiger Preserve Myrtle Beach, USA, Antle B | captive      | M   | individual for validation           |
| GZXJ004   | Snow   | TT            | TT    | Chimelong Safari Park, China, Dong GX     | captive      | F   | RAD-seq for <i>white</i>            |
| GZXJ006   | Snow   | TT            | TT    | Chimelong Safari Park, China, Dong GX     | captive      | F   | RAD-seq for <i>white</i>            |
| GZXJ031   | Snow   | TT            | TT    | Chimelong Safari Park, China, Dong GX     | captive      | F   | RAD-seq for <i>white</i>            |
| GZXJ032   | Snow   | TT            | TT    | Chimelong Safari Park, China, Dong GX     | captive      | F   | RAD-seq for <i>white</i>            |
| GZXJ034   | Snow   | TT            | TT    | Chimelong Safari Park, China, Dong GX     | captive      | M   | WGS for <i>wideband &amp; white</i> |
| GZXJ035   | Snow   | TT            | TT    | Chimelong Safari Park, China, Dong GX     | captive      | M   | WGS for <i>wideband &amp; white</i> |
| GZXJ036   | Snow   | TT            | TT    | Chimelong Safari Park, China, Dong GX     | captive      | M   | RAD-seq for <i>wideband</i>         |
| GZXJ037   | Snow   | TT            | TT    | Chimelong Safari Park, China, Dong GX     | captive      | F   | RAD-seq for <i>wideband</i>         |
| GZXJ038   | Snow   | TT            | TT    | Chimelong Safari Park, China, Dong GX     | captive      | F   | RAD-seq for <i>white</i>            |
| GZXJ046   | Snow   | TT            | TT    | Chimelong Safari Park, China, Dong GX     | captive      | M   | RAD-seq for <i>wideband</i>         |
| GZXJ047   | Snow   | TT            | TT    | Chimelong Safari Park, China, Dong GX     | captive      | M   | RAD-seq for <i>wideband</i>         |
| GZXJ048   | Snow   | TT            | TT    | Chimelong Safari Park, China, Dong GX     | captive      | F   | RAD-seq for <i>wideband</i>         |
| GZXJ050   | Snow   | TT            | TT    | Chimelong Safari Park, China, Dong GX     | captive      | M   | RAD-seq for <i>wideband</i>         |
| Amar      | Snow   | TT            | TT    | Tiger Preserve Myrtle Beach, USA, Antle B | captive      | M   | individual for validation           |
| Joyti     | Snow   | TT            | TT    | Tiger Preserve Myrtle Beach, USA, Antle B | captive      | F   | individual for validation           |
| Kylash    | Snow   | TT            | TT    | Tiger Preserve Myrtle Beach, USA, Antle B | captive      | M   | individual for validation           |
| Raksha    | Snow   | TT            | TT    | Tiger Preserve Myrtle Beach, USA, Antle B | captive      | F   | individual for validation           |
| Saraswati | Snow   | TT            | TT    | Tiger Preserve Myrtle Beach, USA, Antle B | captive      | F   | individual for validation           |
| Shankar   | Snow   | TT            | TT    | Tiger Preserve Myrtle Beach, USA, Antle B | captive      | M   | individual for validation           |
| Simbad    | Snow   | TT            | TT    | Tiger Preserve Myrtle Beach, USA, Antle B | captive      | M   | individual for validation           |
| Sri       | Snow   | TT            | TT    | Tiger Preserve Myrtle Beach, USA, Antle B | captive      | M   | individual for validation           |
| Sundri    | Snow   | TT            | TT    | Tiger Preserve Myrtle Beach, USA, Antle B | captive      | F   | individual for validation           |
| GZXJ001   | White  | CT            | TT    | Chimelong Safari Park, China, Dong GX     | captive      | M   | individual for validation           |
| GZXJ002   | White  | CC            | TT    | Chimelong Safari Park, China, Dong GX     | captive      | F   | individual for validation           |
| GZXJ007   | White  | CT            | TT    | Chimelong Safari Park, China, Dong GX     | captive      | M   | RAD-seq for <i>wideband</i>         |
| GZXJ008   | White  | CC            | TT    | Chimelong Safari Park, China, Dong GX     | captive      | M   | RAD-seq for <i>wideband</i>         |
| GZXJ009   | White  | CC            | TT    | Chimelong Safari Park, China, Dong GX     | captive      | M   | individual for validation           |
| GZXJ010   | White  | CC            | TT    | Chimelong Safari Park, China, Dong GX     | captive      | M   | individual for validation           |
| GZXJ011   | White  | CC            | TT    | Chimelong Safari Park, China, Dong GX     | captive      | M   | individual for validation           |
| GZXJ012   | White  | CT            | TT    | Chimelong Safari Park, China, Dong GX     | captive      | F   | individual for validation           |
| GZXJ013   | White  | CC            | TT    | Chimelong Safari Park, China, Dong GX     | captive      | F   | individual for validation           |
| GZXJ014   | White  | CT            | TT    | Chimelong Safari Park, China, Dong GX     | captive      | F   | individual for validation           |
| GZXJ040   | White  | CC            | TT    | Chimelong Safari Park, China, Dong GX     | captive      | F   | RAD-seq for <i>wideband</i>         |
| GZXJ041   | White  | CT            | TT    | Chimelong Safari Park, China, Dong GX     | captive      | M   | RAD-seq for <i>wideband</i>         |
| GZXJ042   | White  | CT            | TT    | Chimelong Safari Park, China, Dong GX     | captive      | F   | RAD-seq for <i>wideband</i>         |
| GZXJ043   | White  | CT            | TT    | Chimelong Safari Park, China, Dong GX     | captive      | M   | RAD-seq for <i>wideband</i>         |
| GZXJ044   | White  | CT            | TT    | Chimelong Safari Park, China, Dong GX     | captive      | F   | RAD-seq for <i>wideband</i>         |
| GZXJ045   | White  | CC            | TT    | Chimelong Safari Park, China, Dong GX     | captive      | M   | RAD-seq for <i>wideband</i>         |
| GZXJ049   | White  | CC            | TT    | Chimelong Safari Park, China, Dong GX     | captive      | F   | RAD-seq for <i>wideband</i>         |
| GZXJ051   | White  | CC            | TT    | Chimelong Safari Park, China, Dong GX     | captive      | M   | RAD-seq for <i>wideband</i>         |
| Bhavantu  | White  | CT            | TT    | Tiger Preserve Myrtle Beach, USA, Antle B | captive      | M   | individual for validation           |
| Bindi     | White  | CT            | TT    | Tiger Preserve Myrtle Beach, USA, Antle B | captive      | F   | individual for validation           |
| Ganga     | White  | CT            | TT    | Tiger Preserve Myrtle Beach, USA, Antle B | captive      | F   | individual for validation           |
| Ishwari   | White  | CT            | TT    | Tiger Preserve Myrtle Beach, USA, Antle B | captive      | ?   | individual for validation           |
| Lolita    | White  | CT            | TT    | Tiger Preserve Myrtle Beach, USA, Antle B | captive      | F   | individual for validation           |
| Marayani  | White  | CC            | TT    | Tiger Preserve Myrtle Beach, USA, Antle B | captive      | M   | individual for validation           |
| Samasta   | White  | CT            | TT    | Tiger Preserve Myrtle Beach, USA, Antle B | captive      | F   | individual for validation           |
| Shakra    | White  | CC            | TT    | Tiger Preserve Myrtle Beach, USA, Antle B | captive      | F   | individual for validation           |
| Shakti    | White  | CT            | TT    | Tiger Preserve Myrtle Beach, USA, Antle B | captive      | F   | individual for validation           |
| Uma       | White  | CC            | TT    | Tiger Preserve Myrtle Beach, USA, Antle B | captive      | F   | individual for validation           |
| PTIP166   | White  | CC            | TT    | Peking University, China, Luo SJ          | captive      | M   | individual for validation           |
| PTIP167   | White  | CC            | TT    | Peking University, China, Luo SJ          | captive      | F   | individual for validation           |
| PTIP17    | White  | CC            | TT    | Peking University, China, Luo SJ          | captive      | F   | individual for validation           |
| PTIP223   | White  | CC            | TT    | Peking University, China, Luo SJ          | captive      | M   | individual for validation           |
| PTIP289   | White  | CT            | TT    | Peking University, China, Luo SJ          | captive      | F   | individual for validation           |
| PTIP90    | White  | CC            | TT    | Peking University, China, Luo SJ          | captive      | F   | individual for validation           |
| SHZO05    | White  | CT            | TT    | Shanghai Zoo, China, Zheng JQ             | captive      | M   | individual for validation           |





| Animal  | Color  | CORIN SLC45A2 |       | Owner & Contact                  | Birth   |     |                           |
|---------|--------|---------------|-------|----------------------------------|---------|-----|---------------------------|
|         |        | (C>T)         | (C>T) |                                  | Status  | Sex | Note                      |
| PTIP263 | Orange | CC            | CC    | Peking University, China, Luo SJ | wild    | M   | individual for validation |
| PTIP264 | Orange | CC            | CC    | Peking University, China, Luo SJ | wild    | F   | individual for validation |
| PTIP269 | Orange | CC            | CC    | Peking University, China, Luo SJ | captive | F   | individual for validation |
| PTIP271 | Orange | CC            | CC    | Peking University, China, Luo SJ | wild    | M   | individual for validation |
| PTIP272 | Orange | CC            | CC    | Peking University, China, Luo SJ | captive | F   | individual for validation |
| PTIP273 | Orange | CC            | CC    | Peking University, China, Luo SJ | captive | F   | individual for validation |
| PTIP274 | Orange | CC            | CC    | Peking University, China, Luo SJ | captive | F   | individual for validation |
| PTIP276 | Orange | CC            | CC    | Peking University, China, Luo SJ | unk     | M   | individual for validation |
| PTIP279 | Orange | CC            | CC    | Peking University, China, Luo SJ | captive | F   | individual for validation |
| PTIP282 | Orange | CC            | CC    | Peking University, China, Luo SJ | captive | F   | individual for validation |
| PTIP283 | Orange | CC            | CC    | Peking University, China, Luo SJ | unk     | M   | individual for validation |
| PTIP285 | Orange | CC            | CC    | Peking University, China, Luo SJ | captive | F   | individual for validation |
| PTIP286 | Orange | CC            | CC    | Peking University, China, Luo SJ | captive | F   | individual for validation |
| PTIP288 | Orange | CC            | CC    | Peking University, China, Luo SJ | captive | F   | individual for validation |
| PTIP293 | Orange | CC            | CC    | Peking University, China, Luo SJ | unk     | F   | individual for validation |
| PTIP296 | Orange | CC            | CC    | Peking University, China, Luo SJ | wild    | M   | individual for validation |
| PTIP300 | Orange | CC            | CC    | Peking University, China, Luo SJ | wild    | M   | individual for validation |
| PTIP301 | Orange | CC            | CC    | Peking University, China, Luo SJ | unk     | F   | individual for validation |
| PTIP302 | Orange | CC            | CC    | Peking University, China, Luo SJ | unk     | M   | individual for validation |
| PTIP303 | Orange | CC            | CC    | Peking University, China, Luo SJ | captive | M   | individual for validation |
| PTIP305 | Orange | CC            | CC    | Peking University, China, Luo SJ | unk     | F   | individual for validation |
| PTIP306 | Orange | CC            | CC    | Peking University, China, Luo SJ | wild    | M   | individual for validation |
| PTIP307 | Orange | CC            | CC    | Peking University, China, Luo SJ | wild    | M   | individual for validation |
| PTIP309 | Orange | CC            | CC    | Peking University, China, Luo SJ | unk     | F   | individual for validation |
| PTIP310 | Orange | CC            | CC    | Peking University, China, Luo SJ | wild    | F   | individual for validation |
| PTIP311 | Orange | CC            | CC    | Peking University, China, Luo SJ | unk     | M   | individual for validation |
| PTIP312 | Orange | CC            | CC    | Peking University, China, Luo SJ | unk     | F   | individual for validation |
| PTIP313 | Orange | CC            | CC    | Peking University, China, Luo SJ | unk     | M   | individual for validation |
| PTIP315 | Orange | CC            | CC    | Peking University, China, Luo SJ | wild    | M   | individual for validation |
| PTIP316 | Orange | CC            | CC    | Peking University, China, Luo SJ | unk     | unk | individual for validation |
| PTIP320 | Orange | CC            | CC    | Peking University, China, Luo SJ | captive | M   | individual for validation |
| PTIP327 | Orange | CC            | CC    | Peking University, China, Luo SJ | unk     | unk | individual for validation |
| PTIP330 | Orange | CC            | CC    | Peking University, China, Luo SJ | unk     | unk | individual for validation |
| PTIP331 | Orange | CC            | CC    | Peking University, China, Luo SJ | unk     | unk | individual for validation |
| PTIP332 | Orange | CC            | CC    | Peking University, China, Luo SJ | unk     | unk | individual for validation |
| PTIP36  | Orange | CC            | CC    | Peking University, China, Luo SJ | unk     | M   | individual for validation |
| PTIP38  | Orange | CC            | CC    | Peking University, China, Luo SJ | unk     | M   | individual for validation |
| PTIP65  | Orange | CC            | CC    | Peking University, China, Luo SJ | unk     | M   | individual for validation |
| PTIP70  | Orange | CC            | CC    | Peking University, China, Luo SJ | unk     | F   | individual for validation |
| PTIP72  | Orange | CC            | CC    | Peking University, China, Luo SJ | unk     | M   | individual for validation |
| PTIP83  | Orange | CC            | CC    | Peking University, China, Luo SJ | unk     | F   | individual for validation |
| PTIP84  | Orange | CC            | CC    | Peking University, China, Luo SJ | unk     | F   | individual for validation |
| PTIP88  | Orange | CC            | CC    | Peking University, China, Luo SJ | unk     | M   | individual for validation |
| PTIP99  | Orange | CC            | CC    | Peking University, China, Luo SJ | unk     | F   | individual for validation |
| SHZO01  | Orange | CC            | CC    | Shanghai Zoo, China, Zheng JQ    | captive | M   | individual for validation |
| SHZO02  | Orange | CC            | CC    | Shanghai Zoo, China, Zheng JQ    | captive | M   | individual for validation |
| SHZO03  | Orange | CC            | CC    | Shanghai Zoo, China, Zheng JQ    | captive | M   | individual for validation |
| SHZO04  | Orange | CC            | CC    | Shanghai Zoo, China, Zheng JQ    | captive | M   | individual for validation |

1. unk = unknown

**Table S2. Primers for PCR amplification and Sanger sequencing.**

| <b>Gene and Amplicon</b> | <b>Amplicon size (bp)</b> | <b>Forward primer (5' to 3')</b> | <b>Reverse primer (5' to 3')</b> | <b>Reference</b>        |
|--------------------------|---------------------------|----------------------------------|----------------------------------|-------------------------|
| <i>MC1R</i> -ex-a        | 429                       | CATTGTGCCTGAGCTGACAT             | GTCTCCAGCACACTGCTCAC             | Xu <i>et al.</i> (2013) |
| <i>MC1R</i> -ex-b        | 399                       | CTGCACTCGCCCATGTATTA             | CACCAGCATGGCTACAAAGA             | Xu <i>et al.</i> (2013) |
| <i>MC1R</i> -ex-c        | 472                       | TCGCCTACTACGATCACACG             | GCCATAGGATATCCCCACCT             | Xu <i>et al.</i> (2013) |
| <i>ASIP</i> -ex1         | 418                       | TCATCAGTTCCCTTTTCCTG             | GGGAGCACGTTTGACATCTT             | Xu <i>et al.</i> (2013) |
| <i>ASIP</i> -ex2         | 348                       | CTCTTCTCCACACCCTGAG              | CCCTTAGCTCTCTGGGCTTC             | Xu <i>et al.</i> (2013) |
| <i>ASIP</i> -ex3         | 450                       | AGAGTTCCCAAGGCTGAGGT             | AAATGCAAGAAAGCCACACC             | Xu <i>et al.</i> (2013) |
| <i>TYR</i> -ex1-a        | 366                       | GCAGGAGAGATGCAGAGGAG             | TTGGAGGGTCTGAAATCTGG             | Xu <i>et al.</i> (2013) |
| <i>TYR</i> -ex1-b        | 386                       | TGTTCCACAGCAACAAGAA              | TTTGGCAACTTCATGGGATT             | Xu <i>et al.</i> (2013) |
| <i>TYR</i> -ex1-c        | 371                       | TCGCTTCTCTGTGCAGTTTG             | GATCCGTGAAGACGAGGGTA             | Xu <i>et al.</i> (2013) |
| <i>TYR</i> -ex2          | 310                       | CATGATTTCAGAAAAACAGAAGAAA        | TCTCTAGCCACAACCTCTTAACA          | Xu <i>et al.</i> (2013) |
| <i>TYR</i> -ex3          | 356                       | TTTGCCTCCAACCTCCTTACG            | TTTCAACTACCAGGGCCAAC             | Xu <i>et al.</i> (2013) |
| <i>TYR</i> -ex4          | 298                       | TTGGCATCCTTCCATGTCTT             | GGCTTTGGGGATAGCATTTGT            | Xu <i>et al.</i> (2013) |
| <i>TYR</i> -ex5          | 423                       | TAGCAGAGCTGGCATTCAAA             | AAAATGAGGTCAACCTTGTTGG           | Xu <i>et al.</i> (2013) |
| <i>TYRP1</i> -ex1        | 399                       | GGGAAGGGAATCATGTGCTA             | CATTCGTTAGCAGGTCATGG             | Xu <i>et al.</i> (2013) |
| <i>TYRP1</i> -ex2        | 511                       | TGCCATTTTGTCTTCTCCTT             | TGTACATGCAGATCCCCACT             | Xu <i>et al.</i> (2013) |
| <i>TYRP1</i> -ex3        | 399                       | GTGGCACATTTTCACGTTTG             | CTGTCGGGGACCTGAAAAG              | Xu <i>et al.</i> (2013) |
| <i>TYRP1</i> -ex4        | 355                       | CAGGGAGAAAACCAAGCAAA             | TGAGGACTTTCAGACAGCACA            | Xu <i>et al.</i> (2013) |
| <i>TYRP1</i> -ex5        | 249                       | TTCTGTAAGTGTTCCTATAACCTGT        | TGTGACAACCTAGATAAAATCAAAGCA      | Xu <i>et al.</i> (2013) |
| <i>TYRP1</i> -ex6        | 289                       | AGACATTGGCAACGGTTTTTC            | CCATACCACCTGAACGGTCT             | Xu <i>et al.</i> (2013) |
| <i>TYRP1</i> -ex7        | 217                       | TTAACAAGATGTCTTTGGCATATTT        | TTTTGGTAATTTCCACAGAAAAGA         | Xu <i>et al.</i> (2013) |
| <i>TYRP1</i> -ex8        | 250                       | TGTTCTCCTTTTGTTTTTTCACAG         | CAGAGAATTGGTCGTTTGTCA            | Xu <i>et al.</i> (2013) |
| <i>SLC45A2</i> -ex7      | 288                       | TGTTCCCTGTGTTCCCTTGC             | CCCTTCACTGTGTTGGAGGT             | Xu <i>et al.</i> (2013) |
| <i>Corin</i> -ex13       | 214                       | TGCTTCCAGGTTTCTGTCC              | TCCTAGCCAGGCATTAACGTA            | this study              |
| <i>Corin</i> -cds        | 3311                      | GAGGAGCAAGTCGTCCGTAG             | GGAAGCACTCCACAGTCAA              | this study              |

**Table S3. Summary of RAD-seq and WGS in 19 tigers for GWAS.**

| Sample ID      | Raw bases (Gb) | Unique mapped (Gb) | Unique mapped ratio | WGS Seq depth (unique maps) | Unique mapped read pairs (M) | No. <i>PstI</i> sites <sup>1</sup> | <i>PstI</i> coverage ratio | <i>PstI</i> site coverage depth <sup>2</sup> | SNP count <sup>3</sup> | SNP ratio |
|----------------|----------------|--------------------|---------------------|-----------------------------|------------------------------|------------------------------------|----------------------------|----------------------------------------------|------------------------|-----------|
| <b>RAD-seq</b> |                |                    |                     |                             |                              |                                    |                            |                                              |                        |           |
| GZXJ036        | 7.270          | 4.142              | 56.97%              | n/a                         | 21.395                       | 671,459                            | 90.80%                     | 14.466                                       | 626,233                | 70.64%    |
| GZXJ037        | 4.495          | 2.634              | 58.60%              | n/a                         | 13.597                       | 656,863                            | 88.82%                     | 9.193                                        | 468,226                | 52.81%    |
| GZXJ046        | 4.634          | 3.579              | 77.23%              | n/a                         | 18.462                       | 689,209                            | 93.20%                     | 12.482                                       | 645,676                | 72.83%    |
| GZXJ047        | 5.255          | 4.065              | 77.36%              | n/a                         | 20.977                       | 685,594                            | 92.71%                     | 14.183                                       | 667,337                | 75.27%    |
| GZXJ048        | 4.753          | 3.705              | 77.95%              | n/a                         | 19.113                       | 684,725                            | 92.59%                     | 12.923                                       | 631,050                | 71.18%    |
| GZXJ050        | 3.537          | 2.739              | 77.43%              | n/a                         | 14.185                       | 665,320                            | 89.97%                     | 9.591                                        | 530,173                | 59.80%    |
| GZXJ007        | 3.992          | 3.078              | 77.08%              | n/a                         | 15.916                       | 686,072                            | 92.77%                     | 10.761                                       | 595,826                | 67.21%    |
| GZXJ008        | 3.864          | 2.986              | 77.28%              | n/a                         | 15.428                       | 657,450                            | 88.90%                     | 10.431                                       | 581,613                | 65.60%    |
| GZXJ040        | 3.866          | 2.980              | 77.07%              | n/a                         | 15.408                       | 660,228                            | 89.28%                     | 10.418                                       | 559,905                | 63.15%    |
| GZXJ041        | 3.844          | 2.992              | 77.84%              | n/a                         | 15.466                       | 678,701                            | 91.78%                     | 10.457                                       | 580,632                | 65.49%    |
| GZXJ042        | 4.270          | 3.315              | 77.62%              | n/a                         | 17.108                       | 675,690                            | 91.37%                     | 11.567                                       | 610,789                | 68.89%    |
| GZXJ043        | 4.833          | 3.739              | 77.36%              | n/a                         | 19.285                       | 690,705                            | 93.40%                     | 13.039                                       | 649,919                | 73.31%    |
| GZXJ044        | 4.613          | 3.553              | 77.02%              | n/a                         | 18.331                       | 670,745                            | 90.70%                     | 12.394                                       | 650,634                | 73.39%    |
| GZXJ045        | 4.315          | 3.355              | 77.76%              | n/a                         | 17.298                       | 665,133                            | 89.94%                     | 11.696                                       | 631,453                | 71.22%    |
| GZXJ049        | 4.659          | 3.619              | 77.67%              | n/a                         | 18.666                       | 685,771                            | 92.73%                     | 12.621                                       | 643,323                | 72.56%    |
| GZXJ051        | 2.038          | 1.624              | 79.68%              | n/a                         | 8.398                        | 617,060                            | 83.44%                     | 5.678                                        | 356,051                | 40.16%    |
| <b>Average</b> | 4.390          | 3.256              | 75.12%              | n/a                         | 16.815                       | 671,295                            | 90.77%                     | 11.369                                       | 589,303                | 66.47%    |
| <b>Total</b>   | 70.239         | 52.103             | 74.18%              | n/a                         | 269.034                      | 739,518                            | 100%                       | 181.898                                      | 886,564                | 100%      |
| <b>WGS</b>     |                |                    |                     |                             |                              |                                    |                            |                                              |                        |           |
| GZXJ034        | 85.036         | 74.027             | 87.05%              | 30.558                      |                              |                                    |                            |                                              |                        |           |
| GZXJ035        | 78.945         | 70.798             | 89.68%              | 29.608                      |                              |                                    |                            |                                              |                        |           |
| GZXJ039        | 82.319         | 74.385             | 90.36%              | 31.108                      |                              |                                    |                            |                                              |                        |           |
| <b>Average</b> | 82.100         | 73.07              | 89.03%              | 30.558                      |                              |                                    |                            |                                              |                        |           |

1. A *PstI* site was counted only when both upstream and downstream of the site were covered by the P1 reads of RADSeq data.
2. *PstI* site coverage depth was calculated by uniquely mapped read pairs divided by number of *PstI* sites.
3. A SNP was counted only when data was available from 6 samples and exhibited polymorphism among the samples.

**Table S4. Genes located within the 9.2 Mb region associated with the *WB* locus**

| Scaffold     | start   | end     | Gene                | Description                                                                                                                                                                                                                |
|--------------|---------|---------|---------------------|----------------------------------------------------------------------------------------------------------------------------------------------------------------------------------------------------------------------------|
| scaffold1457 | 1702057 | 1714742 | <i>OCIAD2</i>       | OCIA domain containing 2.                                                                                                                                                                                                  |
| scaffold1457 | 1723169 | 1748562 | <i>OCIAD1</i>       | OCIA domain containing 1.                                                                                                                                                                                                  |
| scaffold1457 | 1758261 | 1758548 | <i>RPS21</i>        | Ribosomal protein S21.                                                                                                                                                                                                     |
| scaffold1457 | 1907736 | 2054288 | <i>FRYL</i>         | FRY-like.                                                                                                                                                                                                                  |
| scaffold1457 | 2059201 | 2061054 | <i>ZARI</i>         | Zygote arrest 1, the maternal effect gene is oocyte-specific and encodes a protein that is thought to function in the initiation of embryogenesis.                                                                         |
| scaffold1457 | 2064914 | 2069943 | <i>SLC10A4</i>      | Solute carrier family 10, member 4.                                                                                                                                                                                        |
| scaffold1457 | 2136797 | 2174285 | <i>SLAIN2</i>       | SLAIN motif family, member 2                                                                                                                                                                                               |
| scaffold1457 | 2303541 | 2391690 | <i>TEC</i>          | The protein encoded by this gene belongs to the Tec family of non-receptor protein-tyrosine kinases containing a pleckstrin homology domain.                                                                               |
| scaffold1457 | 2413405 | 2455308 | <i>TXK</i>          | TXK tyrosine kinase.                                                                                                                                                                                                       |
| scaffold1457 | 2474274 | 2499970 | <i>NIPAL1</i>       | NIPA-like domain containing 1                                                                                                                                                                                              |
| scaffold1457 | 2531986 | 2552038 | <i>CNGA1</i>        | The protein encoded by this gene is involved in phototransduction.                                                                                                                                                         |
| scaffold1457 | 2567931 | 2635094 | <i>NFXL1</i>        | Nuclear transcription factor, X-box binding-like 1.                                                                                                                                                                        |
| scaffold1457 | 2643215 | 2892269 | <b><i>CORIN</i></b> | <b>CORIN, a serine protease, regulates blood pressure by converting pro-ANP to active ANP, and modifies pigmentation through agouti pathway.</b>                                                                           |
| scaffold1457 | 2896348 | 2972767 | <i>ATP10D</i>       | ATPase, Class V, Type 10D.                                                                                                                                                                                                 |
| scaffold1457 | 3024887 | 3032276 | <i>COMMD8</i>       | COMM domain containing 8.                                                                                                                                                                                                  |
| scaffold1457 | 3053059 | 3152623 | <i>GABRB1</i>       | GABRB1 is a member of the GABA-A receptor gene family of heteromeric pentameric ligand-gated ion channels.                                                                                                                 |
| scaffold1457 | 3457791 | 3522485 | <i>GABRA4</i>       | GABRA4 is a member of the GABA-A receptor gene family of heteromeric pentameric ligand-gated ion channels                                                                                                                  |
| scaffold1457 | 3695631 | 3695858 | <i>COX7B2</i>       | Cytochrome c oxidase subunit VIIb2                                                                                                                                                                                         |
| scaffold1457 | 3718243 | 3719410 | <i>AMD1</i>         | This gene encodes an important intermediate enzyme (adenosylmethionine decarboxylase 1) in polyamine biosynthesis.                                                                                                         |
| scaffold1457 | 3957480 | 4080396 | <i>GABRA2</i>       | GABRA2 is a member of the GABA-A receptor gene family of heteromeric pentameric ligand-gated ion channels.                                                                                                                 |
| scaffold1457 | 4180616 | 4245668 | <i>GABRG1</i>       | GABRG1 is a member of the GABA-A receptor gene family of heteromeric pentameric ligand-gated ion channels.                                                                                                                 |
| scaffold1457 | 5191460 | 5191870 | <i>AHCY</i>         | This gene encodes adenosylhomocysteinase, which regulates the intracellular S-adenosylhomocysteine (SAH) concentration thought to be important for transmethylation reactions.                                             |
| scaffold1457 | 5247021 | 5247604 | <i>PFN1</i>         | This gene encodes a member of the profilin family of small actin-binding proteins. The encoded protein plays an important role in actin dynamics by regulating actin polymerization in response to extracellular signals.  |
| scaffold1457 | 5313895 | 5340309 | <i>GNPDA2</i>       | Glucosamine-6-phosphate deaminase 2 is an allosteric enzyme that catalyzes the reversible reaction converting D-glucosamine-6-phosphate into D-fructose-6-phosphate and ammonium.                                          |
| scaffold1457 | 5344182 | 5365639 | <i>GUF1</i>         | GUF1 GTPase homolog.                                                                                                                                                                                                       |
| scaffold1457 | 5387429 | 5411941 | <i>YIPF7</i>        | Yip1 domain family, member 7.                                                                                                                                                                                              |
| scaffold1457 | 5499902 | 5500279 | <i>CALM1</i>        | This gene encodes a member of the EF-hand calcium-binding protein family.                                                                                                                                                  |
| scaffold1457 | 5601425 | 5852257 | <i>KCTD8</i>        | Potassium channel tetramerization domain containing 8                                                                                                                                                                      |
| scaffold97   | 5775335 | 5901979 | <i>GRXCR1</i>       | This gene encodes a protein which contains GRX-like domains; these domains play a role in the S-glutathionylation of proteins and may be involved in actin organization in hair cells.                                     |
| scaffold97   | 5660849 | 5661106 | <i>MRPL42</i>       | Mitochondrial ribosomal protein L42.                                                                                                                                                                                       |
| scaffold97   | 5367350 | 5559987 | <i>ATP8A1</i>       | ATPase, aminophospholipid transporter (APLT), class I, type 8A, member 1.                                                                                                                                                  |
| scaffold97   | 5355011 | 5355451 | <i>SHISA3</i>       | Shisa family member 3.                                                                                                                                                                                                     |
| scaffold97   | 5195908 | 5198111 | <i>TOM1L1</i>       | TOM1L1 belongs to a family of TOM1 (604700)-related proteins involved in endocytosis.                                                                                                                                      |
| scaffold97   | 5127140 | 5151148 | <i>BEND4</i>        | BEN domain containing 4.                                                                                                                                                                                                   |
| scaffold97   | 5027882 | 5083207 | <i>SLC30A9</i>      | Solute carrier family 30 (zinc transporter), member 9.                                                                                                                                                                     |
| scaffold97   | 4965341 | 4984434 | <i>TMEM33</i>       | Transmembrane protein 33.                                                                                                                                                                                                  |
| scaffold97   | 4799268 | 4801620 | <i>PHOX2B</i>       | Paired-like homeobox 2b functions as a transcription factor involved in the development of several major noradrenergic neuron populations and the determination of neurotransmitter phenotype.                             |
| scaffold97   | 4543535 | 4743582 | <i>LIMCH1</i>       | LIM and calponin homology domains 1.                                                                                                                                                                                       |
| scaffold97   | 4340395 | 4353221 | <i>UCHL1</i>        | The protein encoded by this gene belongs to the peptidase C12 family. This enzyme is a thiol protease that hydrolyzes a peptide bond at the C-terminal glycine of ubiquitin.                                               |
| scaffold97   | 3921344 | 4110223 | <i>APBB2</i>        | The protein encoded by this gene interacts with the cytoplasmic domains of amyloid beta (A4) precursor protein and amyloid beta (A4) precursor-like protein 2.                                                             |
| scaffold97   | 3612440 | 3622668 | <i>RBM47</i>        | RNA binding motif protein 47.                                                                                                                                                                                              |
| scaffold97   | 3543968 | 3556619 | <i>CHRNA9</i>       | This gene is a member of the ligand-gated ionic channel family and nicotinic acetylcholine receptor gene superfamily. It encodes a plasma membrane protein that forms homo- or hetero-oligomeric divalent cation channels. |
| scaffold97   | 3471842 | 3472404 | <i>RHOH</i>         | The protein encoded by this gene is a member of the Ras superfamily of guanosine triphosphate (GTP)-metabolizing enzymes.                                                                                                  |
| scaffold97   | 3342991 | 3395241 | <i>N4BP2</i>        | NEDD4 binding protein 2 can bind to both B-cell leukemia/lymphoma 3 (BCL-3) and neural precursor cell expressed, developmentally downregulated 4, (Nedd4) proteins.                                                        |
| scaffold97   | 3109775 | 3237547 | <i>PDS5A</i>        | The protein encoded by this gene binds to the cohesin complex and associates with chromatin through most of the cell cycle.                                                                                                |
| scaffold97   | 2993833 | 3062282 | <i>UBE2K</i>        | The protein encoded by this gene belongs to the ubiquitin-conjugating enzyme family. This protein interacts with RING finger proteins, and it can ubiquitinate huntingtin, the gene product for Huntington's disease.      |
| scaffold97   | 2853674 | 2894549 | <i>SMIM14</i>       | Small integral membrane protein 14.                                                                                                                                                                                        |
| scaffold97   | 2808961 | 2825017 | <i>UGDH</i>         | The protein encoded by this gene converts UDP-glucose to UDP-glucuronate and thereby participates in the biosynthesis of glycosaminoglycans such as hyaluronan, chondroitin sulfate, and heparan sulfate.                  |
| scaffold97   | 2785239 | 2800594 | <i>LIAS</i>         | Lipoic acid synthetase, involves in the cell growth.                                                                                                                                                                       |
| scaffold97   | 2780714 | 2784403 | <i>RPL9</i>         | Ribosomal protein L9.                                                                                                                                                                                                      |
| scaffold97   | 2741158 | 2774128 | <i>KLB</i>          | Klotho beta is an essential cofactor for FGF21 activity and suggested that the Klotho gene family may have evolved to confer tissue-specific bioactivity on FGF19 (603891) subfamily members.                              |
| scaffold97   | 2643471 | 2706239 | <i>RFC1</i>         | This gene encodes the large subunit of replication factor C, a five subunit DNA polymerase accessory protein, which is a DNA-dependent ATPase required for eukaryotic DNA replication and repair.                          |
| scaffold97   | 2534048 | 2624602 | <i>WDR19</i>        | This gene encodes a member of the WD repeat protein family. Members of this family are involved in a variety of cellular processes, including cell cycle progression, signal transduction, apoptosis, and gene regulation. |
| scaffold97   | 2434396 | 2499017 | <i>KLHL5</i>        | Kelch-like family member 5.                                                                                                                                                                                                |
| scaffold97   | 2346827 | 2380860 | <i>TMEM156</i>      | Transmembrane protein 156.                                                                                                                                                                                                 |
| scaffold97   | 2255513 | 2310967 | <i>FAM114A1</i>     | Family with sequence similarity 114, member A1.                                                                                                                                                                            |
| scaffold97   | 2217896 | 2220283 | <i>TLR6</i>         | Toll-like receptor 6 is a member of the Toll-like receptor (TLR) family which plays a fundamental role in pathogen recognition and activation of innate immunity.                                                          |
| scaffold97   | 2190563 | 2191732 | <i>TLR1</i>         | Toll-like receptor 1 is a member of the Toll-like receptor (TLR) family which plays a fundamental role in pathogen recognition and activation of innate immunity.                                                          |
| scaffold97   | 2163113 | 2165542 | <i>TLR10</i>        | Toll-like receptor 10 is a member of the Toll-like receptor (TLR) family which plays a fundamental role in pathogen recognition and activation of innate immunity.                                                         |
| scaffold97   | 2081886 | 2098226 | <i>KLF3</i>         | Kruppel-like factor 3 (basic).                                                                                                                                                                                             |
| scaffold97   | 1728297 | 1728665 | <i>RPL41</i>        | Ribosomal protein L41.                                                                                                                                                                                                     |
| scaffold97   | 1429354 | 1643878 | <i>TBC1D1</i>       | TBC1D1 is the founding member of a family of proteins sharing a 180- to 200-amino acid TBC domain presumed to have a role in regulating cell growth and differentiation.                                                   |

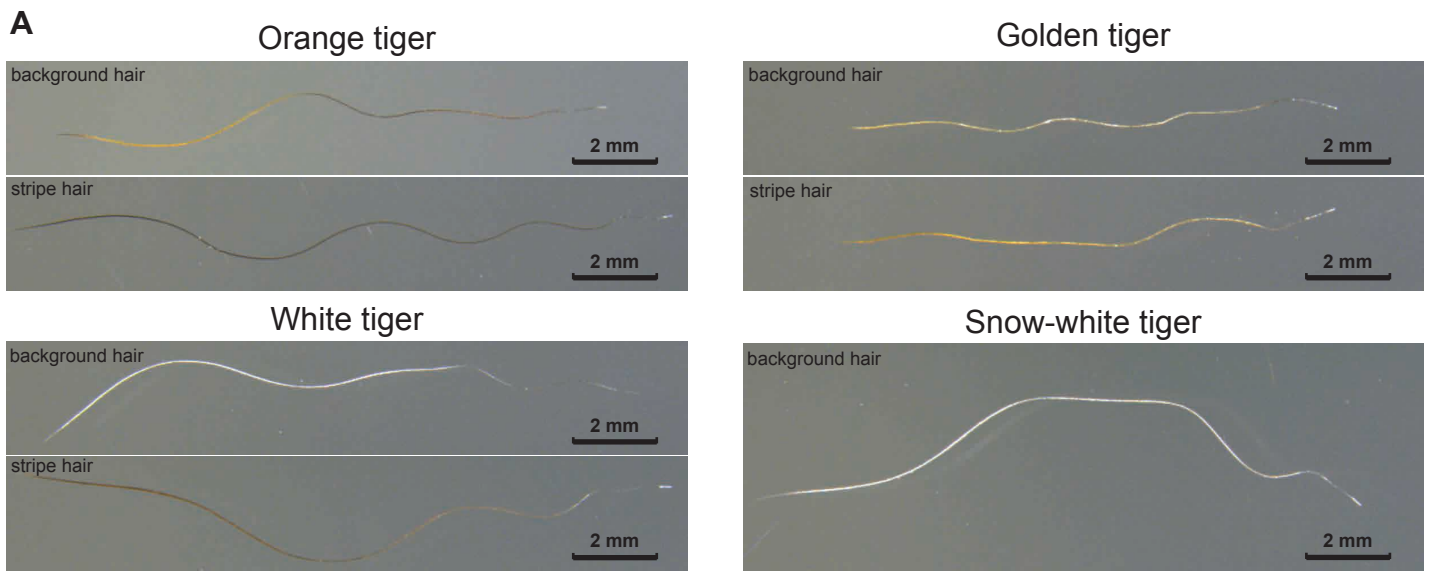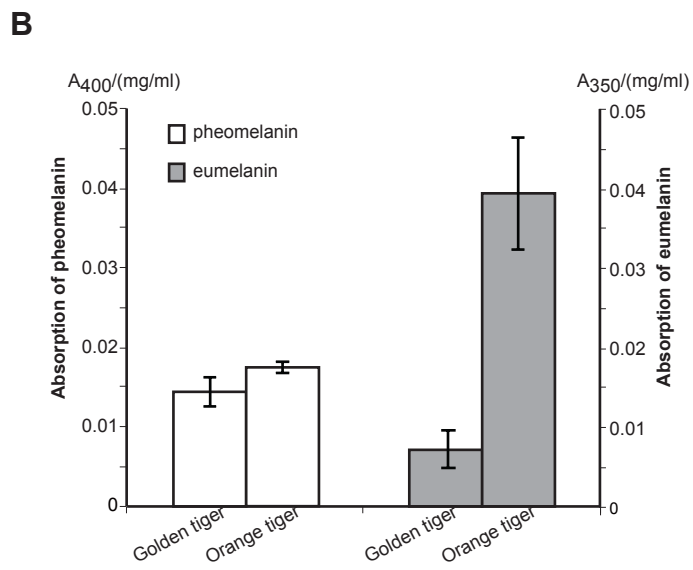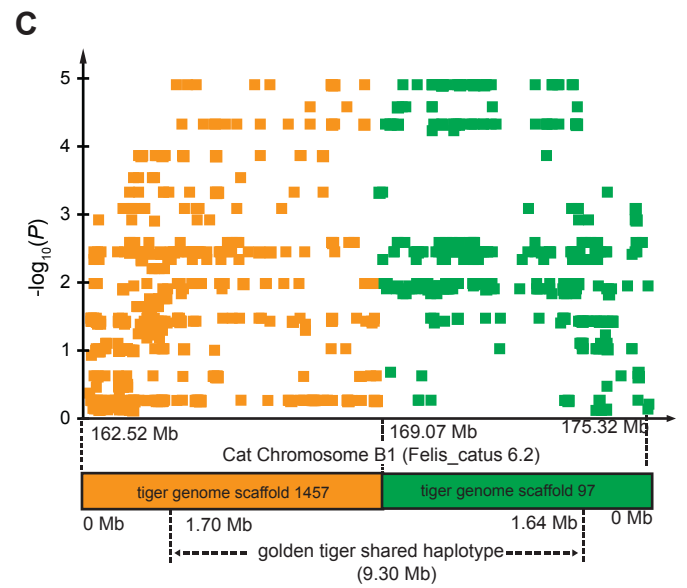

Figure S1
